# Supplementary material for: Understanding abortion-related complications in health facilities: results from WHO multicountry survey on abortion (MCS-A) across 11 sub-Saharan African countries
Source: HighWire-hosted journal article supplement (doi:10.1136/bmjgh-2020-003702), 2021-01-01
Supplement: bmjgh-2020-003702supp003_data_supplement.pdf [file bmjgh-2020-003702supp003_data_supplement.pdf]

**Understanding abortion-related complications in health facilities: Results from WHO multi-country survey on abortion (MCS-A) across 11 African countries**

**Supplementary File**

## Annex III. Facility Characteristics

|                                                                                                       | Benin           | Burkina Faso     | Chad             | DRC              | Ghana            | Kenya            | Malawi           | Mozambique       | Niger           | Nigeria          | Uganda           | Total             |
|-------------------------------------------------------------------------------------------------------|-----------------|------------------|------------------|------------------|------------------|------------------|------------------|------------------|-----------------|------------------|------------------|-------------------|
| <b>Number of participating facilities</b>                                                             | <b>10</b>       | <b>21</b>        | <b>15</b>        | <b>24</b>        | <b>19</b>        | <b>21</b>        | <b>23</b>        | <b>19</b>        | <b>10</b>       | <b>29</b>        | <b>19</b>        | <b>210</b>        |
| <b>Location</b>                                                                                       |                 |                  |                  |                  |                  |                  |                  |                  |                 |                  |                  |                   |
| Urban                                                                                                 | 10              | 21               | 14               | 18               | 16               | 18               | 17               | 10               | 10              | 27               | 13               | <b>174</b>        |
| Rural                                                                                                 | 0               | 0                | 1                | 6                | 3                | 3                | 6                | 9                | 0               | 2                | 6                | <b>36</b>         |
| <b>Facility level</b>                                                                                 |                 |                  |                  |                  |                  |                  |                  |                  |                 |                  |                  |                   |
| Primary                                                                                               | 8 (80)          | 0                | 1 (6.7)          | 5 (20.8)         | 2 (10.5)         | 0                | 0                | 0                | 0               | 0                | 3 (16.7)         | <b>19 (19.0)</b>  |
| Secondary                                                                                             | 0               | 14 (66.7)        | 5 (33.3)         | 16 (66.7)        | 11 (57.9)        | 11 (47.9)        | 22 (95.7)        | 11 (57.9)        | 9 (90.)         | 22 (75.9)        | 4 (22.2)         | <b>125 (59.2)</b> |
| Tertiary                                                                                              | 2 (20)          | 7 (33.3)         | 8 (53.3)         | 2 (8.3)          | 6 (31.6)         | 8 (34.8)         | 1 (4.4)          | 6 (31.6)         | 0               | 7 (24.1)         | 8 (44.4)         | <b>55 (26.1)</b>  |
| Other                                                                                                 | 0               | 0                | 1 (6.7)          | 1 (6.7)          | 0                | 4 (17.4)         | 0                | 2 (10.5)         | 1 (10.0)        | 0                | 3 (16.7)         | <b>12 (5.7)</b>   |
| <b>Resources currently used at facility</b>                                                           |                 |                  |                  |                  |                  |                  |                  |                  |                 |                  |                  |                   |
| Safe Abortion Guidance/Clinical Handbook                                                              | 8 (80.0)        | 17 (80.9)        | 7 (46.7)         | 10 (43.5)        | 14 (73.7)        | 9 (39.1)         | 19 (82.6)        | 14 (73.7)        | 8 (80.0)        | 16 (55.2)        | 8 (42.1)         | <b>130 (62.2)</b> |
| WHO guidelines (e.g. for postpartum haemorrhage)                                                      | 10 (100)        | 19 (90.5)        | 8 (53.3)         | 20 (83.3)        | 18 (94.7)        | 20 (95.2)        | 23 (100)         | 17 (89.5)        | 9 (90.0)        | 26 (89.7)        | 14 (73.7)        | <b>184 (87.6)</b> |
| Evidence-based, locally adapted guidelines                                                            | 10 (100)        | 17 (80.9)        | 5 (33.3)         | 14 (58.3)        | 16 (84.2)        | 17 (80.9)        | 10 (52.6)        | 21 (91.3)        | 8 (80.0)        | 26 (89.7)        | 11 (61.1)        | <b>155 (74.2)</b> |
| Clinical audits (e.g. maternal deaths reviews)                                                        | 10 (100)        | 19 (90.5)        | 8 (53.3)         | 22 (91.7)        | 19 (100)         | 21 (100)         | 22 (95.7)        | 19 (100)         | 10 (10)         | 27 (93.1)        | 15 (78.9)        | <b>192 (91.4)</b> |
| <b>Surgical abortion method employed for gestational age up to 12-14 weeks</b>                        | <b>7 (70.0)</b> | <b>18 (85.7)</b> | <b>12 (80.0)</b> | <b>13 (56.5)</b> | <b>14 (73.7)</b> | <b>17 (80.9)</b> | <b>23 (100)</b>  | <b>14 (73.7)</b> | <b>9 (90.0)</b> | <b>17 (60.7)</b> | <b>15 (78.9)</b> | <b>159 (76.4)</b> |
| <b>Medical abortion offered at the facility (including medical management of incomplete abortion)</b> | <b>10 (100)</b> | <b>19 (90.5)</b> | <b>14 (93.3)</b> | <b>12 (54.6)</b> | <b>14 (73.7)</b> | <b>18 (85.7)</b> | <b>19 (82.6)</b> | <b>11 (57.9)</b> | <b>8 (80.0)</b> | <b>27 (93.1)</b> | <b>16 (84.2)</b> | <b>168 (80.8)</b> |
| <b>Abortion for gestational age &gt;13 weeks offered at facility</b>                                  | <b>7 (70.0)</b> | <b>18 (85.7)</b> | <b>13 (86.7)</b> | <b>10 (45.5)</b> | <b>10 (52.6)</b> | <b>14 (66.7)</b> | <b>20 (86.9)</b> | <b>8 (42.1)</b>  | <b>6 (60.0)</b> | <b>18 (62.1)</b> | <b>7 (36.8)</b>  | <b>131 (62.9)</b> |
| <b>Post-abortion contraception offered at facility</b>                                                | <b>9 (90.0)</b> | <b>19 (90.5)</b> | <b>14 (93.3)</b> | <b>18 (75.0)</b> | <b>18 (94.7)</b> | <b>19 (90.5)</b> | <b>22 (95.7)</b> | <b>19 (100)</b>  | <b>10 (100)</b> | <b>28 (96.6)</b> | <b>14 (73.7)</b> | <b>190 (90.5)</b> |

### References

1. Johnson BR, Jr., Mishra V, Lavelanet AF, Khosla R, Ganatra B. A global database of abortion laws, policies, health standards and guidelines. *Bull World Health Organ* 2017; **95**(7): 542-4.
2. Johnson BR, Lavelanet AF, Schlitt S. Global Abortion Policies Database: a new approach to strengthening knowledge on laws, policies, and human rights standards. *BMC International Health and Human Rights* 2018; **18**(1): 35.
