# Supplementary material for: Understanding abortion-related complications in health facilities: results from WHO multicountry survey on abortion (MCS-A) across 11 sub-Saharan African countries
Source: HighWire-hosted journal article supplement (doi:10.1136/bmjgh-2020-003702), 2021-01-01
Supplement: bmjgh-2020-003702supp004_data_supplement.pdf [file bmjgh-2020-003702supp004_data_supplement.pdf]

**Understanding abortion-related complications in health facilities: Results from WHO multi-country survey on abortion (MCS-A) across 11 African countries**

**Supplementary File**

3

## Annex IV. Criteria for hierarchal classification of abortion-related complications

| WHO Near-Miss Criteria (264, 1.9%) |            | Potentially-life threatening complications (PLTC) (957, 7.0%) |            | Moderate (7953, 58.2%)                                                                                                                                                     |             | Mild (4424, 32.4%)                                                                                                                     |             |
|------------------------------------|------------|---------------------------------------------------------------|------------|----------------------------------------------------------------------------------------------------------------------------------------------------------------------------|-------------|----------------------------------------------------------------------------------------------------------------------------------------|-------------|
| Organ dysfunction                  | N (%)      | Symptoms                                                      | N (%)      | Symptoms                                                                                                                                                                   | N (%)       | Signs and symptoms on initial assessment                                                                                               | N (%)       |
| <b>Cardiovascular</b>              | 165 (62.5) | Severe haemorrhage                                            | 703 (73.5) | Bleeding<br><i>Heavy bright red vaginal bleeding (with or without clots), Blood soaked pads/towels/clothing, pallor</i>                                                    | 7656 (96.3) | Vaginal Bleeding                                                                                                                       | 3470 (78.4) |
| <b>Respiratory</b>                 | 61 (23.1)  | Severe systemic infection                                     | 327 (34.2) | Suspected intraabdominal injury<br><i>Abdominal pain/cramping, nausea, vomiting distended/tense/hard abdomen Shoulder pain Decreased bowel sounds, rebound, tenderness</i> | 850 (10.7)  | Cervix open                                                                                                                            | 3529 (79.8) |
| <b>Renal</b>                       | 27 (10.2)  | Uterine perforation                                           | 39 (4.1)   | Infection<br><i>Chills, fevers, sweats Foul smelling vagina discharge History of interference with pregnancy</i>                                                           | 494 (6.2)   | Abnormal vital signs <i>based on temperature, heart rate, systolic/diastolic blood pressure, and respiratory rate</i>                  | 1156 (26.1) |
| <b>Coagulation</b>                 | 33 (12.5)  |                                                               |            |                                                                                                                                                                            |             | Uterine tenderness                                                                                                                     | 736 (16.6)  |
| <b>Neurologic</b>                  | 29 (10.9)  |                                                               |            |                                                                                                                                                                            |             | Abnormal mental status <i>Agitated, lethargic, comatose</i>                                                                            | 627 (14.2)  |
| <b>Hepatic</b>                     | 18 (6.8)   |                                                               |            |                                                                                                                                                                            |             | Abnormal abdominal examination<br><i>Rebounding/guarding, Distended, decreased bowel sounds, tense/hard, tenderness on palpitation</i> | 633 (14.3)  |
| <b>Uterine</b>                     | 26 (9.9)   |                                                               |            |                                                                                                                                                                            |             | Abnormal appearance<br><i>Sick-looking, pallor, jaundice, clammy</i>                                                                   | 440 (9.9)   |
|                                    |            |                                                               |            |                                                                                                                                                                            |             | Cervical Motion Tenderness                                                                                                             | 362 (8.2)   |
|                                    |            |                                                               |            |                                                                                                                                                                            |             | Foul smelling vaginal discharge                                                                                                        | 237 (5.4)   |
|                                    |            |                                                               |            |                                                                                                                                                                            |             | Evidence of foreign body                                                                                                               | 25 (0.57)   |
|                                    |            |                                                               |            |                                                                                                                                                                            |             | Adnexal mass                                                                                                                           | 11 (0.25)   |

## References

1. Johnson BR, Jr., Mishra V, Lavelanet AF, Khosla R, Ganatra B. A global database of abortion laws, policies, health standards and guidelines. *Bull World Health Organ* 2017; **95**(7): 542-4. 2.
2. Johnson BR, Lavelanet AF, Schlitt S. Global Abortion Policies Database: a new approach to strengthening knowledge on laws, policies, and human rights standards. *BMC International Health and Human Rights* 2018; **18**(1): 35.
